# Supplementary material for: Atomic layer deposition of Al2O3 on MoS2, WS2, WSe2, and h-BN: surface coverage and adsorption energy
Source: Royal Society of Chemistry journal article supplement (doi:10.1039/c6ra24733d), 2017-01-01
Supplement: c6ra24733d1.pdf [file c6ra24733d1.pdf]

## SUPPLEMENTARY INFORMATION

### **Atomic layer deposition of Al<sub>2</sub>O<sub>3</sub> on MoS<sub>2</sub>, WS<sub>2</sub>, WSe<sub>2</sub>, and *h*-BN: surface coverage and adsorption energy**

Taejin Park,<sup>§a,b</sup> Hoijoon Kim,<sup>§c</sup> Mirine Leem,<sup>c</sup> Wonsik Ahn,<sup>c</sup> Seongheum Choi,<sup>c</sup> Jinbum Kim,<sup>a,b</sup> Joon Uh,<sup>a</sup> Keewon Kwon,<sup>b</sup> Seong-Jun Jeong,<sup>d</sup> Seongjun Park,<sup>d</sup> Yunseok Kim,<sup>\*c</sup> and Hyoungsub Kim<sup>\*c</sup>

<sup>a</sup>*Semiconductor R&D Center, Samsung Electronics, Hwaseong 18488, Republic of Korea*

<sup>b</sup>*Department of Semiconductor and Display Engineering, Sungkyunkwan University, Suwon 16419, Republic of Korea*

<sup>c</sup>*School of Advanced Materials Science and Engineering, Sungkyunkwan University, Suwon 16419, Republic of Korea*

<sup>d</sup>*Nano-Electronics Lab., Devices System Research Center, Samsung Advanced Institute of Technology, Suwon 16678, Republic of Korea*

\*E-mail: [yunseokkim@skku.edu](mailto:yunseokkim@skku.edu) and [hsubkim@skku.edu](mailto:hsubkim@skku.edu)

§These authors contributed equally to this work.

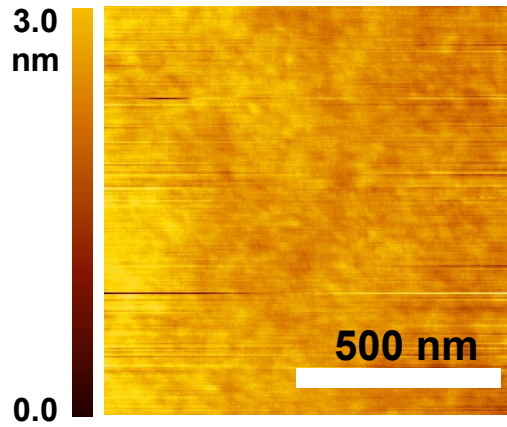

**Fig. S1.** AFM topography image of the thick ALD- $\text{Al}_2\text{O}_3$  film ( $\sim 10$  nm) deposited on Si at 250 °C.

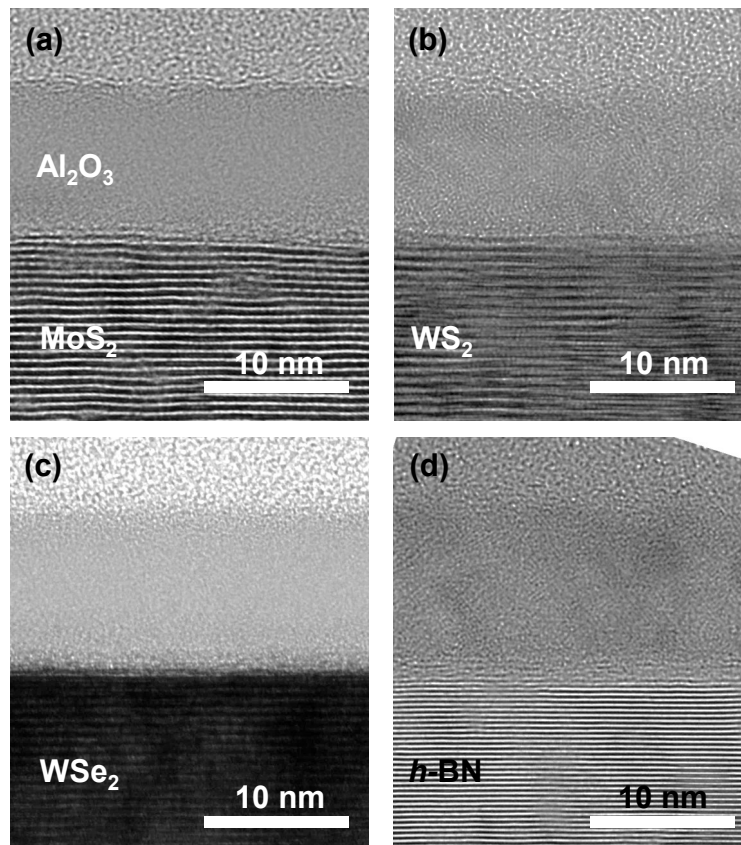

**Fig. S2.** Selected local cross-sectional TEM images of the thick ALD- $\text{Al}_2\text{O}_3$  films ( $\sim 10$  nm) conformally deposited on (a)  $\text{MoS}_2$ , (b)  $\text{WS}_2$ , (c)  $\text{WSe}_2$ , and (d)  $h\text{-BN}$  flakes at 250 °C.

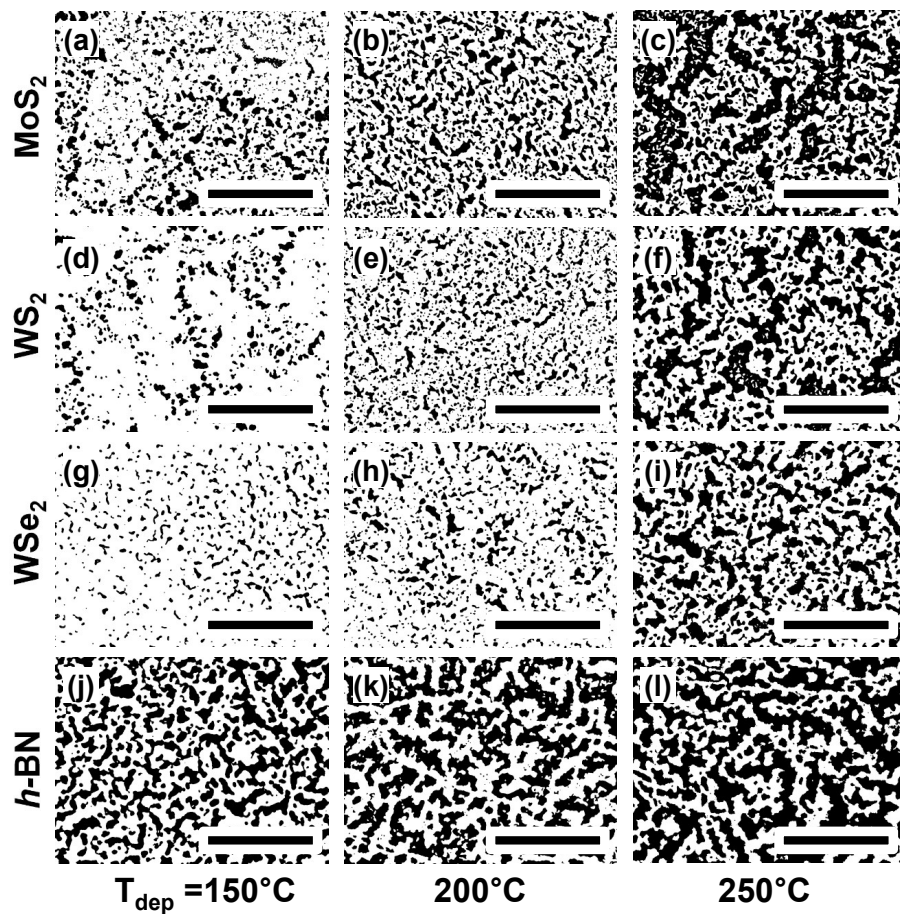

**Fig. S3.** Binary contrast images converted from the SEM images in Fig. 3. The ALD-Al<sub>2</sub>O<sub>3</sub> films (0.9–1.1 nm) were deposited on (a–c) MoS<sub>2</sub>, (d–f) WS<sub>2</sub>, (g–i) WSe<sub>2</sub>, and (j–l) *h*-BN flakes at various temperatures (150, 200, and 250 °C). The scale bar is 500 nm.

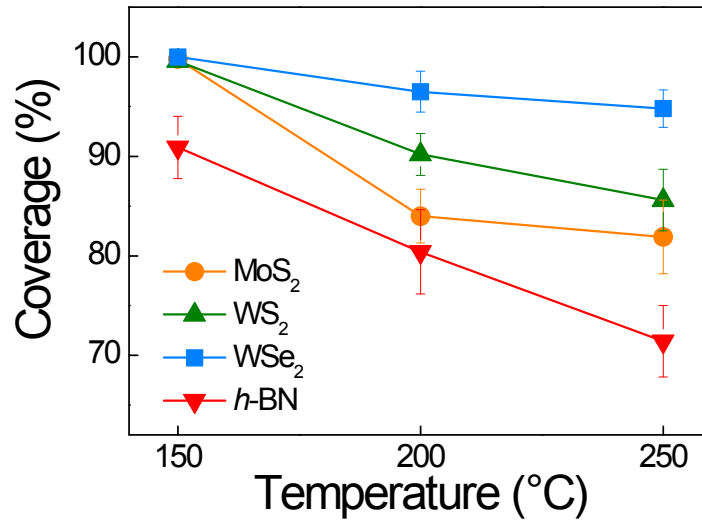

**Fig. S4.** AFM-measured surface coverage of the thick ALD-Al<sub>2</sub>O<sub>3</sub> films (~10 nm) deposited on MoS<sub>2</sub>, WS<sub>2</sub>, WSe<sub>2</sub>, and h-BN flakes at various temperatures (150, 200, and 250 °C). The coverage was quantified using 10 line (height) profiles arbitrarily selected from the measured AFM data (Fig. 2) using the following criteria. The standard deviation ( $\sigma$ ) was defined as a root mean square (RMS) surface roughness obtained from the local regions with conformal film coating for each samples (see Table S1), and we defined deposition failure when the film thickness at a specific point was less than the expected thickness (10 nm) by  $3\sigma$ .

**Table S1.** RMS values obtained from the AFM images in Fig. 2. The thick ALD-Al<sub>2</sub>O<sub>3</sub> films (~10 nm) were deposited on MoS<sub>2</sub>, WS<sub>2</sub>, WSe<sub>2</sub>, and *h*-BN flakes at various temperatures.

| Substrate        | Temp. (°C) | RMS <sub>total</sub> * (nm) | RMS <sub>local</sub> ** (nm) |
|------------------|------------|-----------------------------|------------------------------|
| MoS <sub>2</sub> | 150        | 0.315                       | 0.224                        |
|                  | 200        | 2.879                       | 0.329                        |
|                  | 250        | 2.880                       | 0.347                        |
| WS <sub>2</sub>  | 150        | 0.410                       | 0.306                        |
|                  | 200        | 1.211                       | 0.355                        |
|                  | 250        | 2.098                       | 0.359                        |
| WSe <sub>2</sub> | 150        | 0.389                       | 0.312                        |
|                  | 200        | 0.544                       | 0.295                        |
|                  | 250        | 0.507                       | 0.333                        |
| <i>h</i> -BN     | 150        | 0.947                       | 0.440                        |
|                  | 200        | 1.867                       | 0.363                        |
|                  | 250        | 2.420                       | 0.451                        |

\* RMS values obtained from a total scanned area of 1 μm × 1 μm.

\*\* RMS values obtained from selected local areas with a conformal ALD-Al<sub>2</sub>O<sub>3</sub> (~10 nm) coating.

**Table S2.** Parameters ( $1-\theta$  and  $E_{\text{ads}}$ ) extracted from the SEM-measured surface coverage of the thin ALD- $\text{Al}_2\text{O}_3$  films (0.9–1.1 nm) deposited on  $\text{MoS}_2$ ,  $\text{WS}_2$ ,  $\text{WSe}_2$ , and  $h$ -BN flakes at various temperatures (150, 200, and 250 °C).  $1-\theta$  was directly obtained from the SEM image (Fig. 3 and S3) , whereas  $E_{\text{ads}}$  was extracted from the slope in Fig. 4(b).

| Substrate      | Temp. (°C) | $1-\theta$ | $ E_{\text{ads}} $ (J)              | $R^2$ * |
|----------------|------------|------------|-------------------------------------|---------|
| $\text{MoS}_2$ | 150        | 0.245      | $2.29 \times 10^{-20}$<br>(0.14 eV) | 0.99    |
|                | 200        | 0.343      |                                     |         |
|                | 250        | 0.522      |                                     |         |
| $\text{WS}_2$  | 150        | 0.144      | $3.50 \times 10^{-20}$<br>(0.22 eV) | 0.98    |
|                | 200        | 0.235      |                                     |         |
|                | 250        | 0.458      |                                     |         |
| $\text{WSe}_2$ | 150        | 0.107      | $4.09 \times 10^{-20}$<br>(0.26 eV) | 0.98    |
|                | 200        | 0.189      |                                     |         |
|                | 250        | 0.412      |                                     |         |
| $h$ -BN        | 150        | 0.439      | $7.15 \times 10^{-21}$<br>(0.05 eV) | 0.93    |
|                | 200        | 0.474      |                                     |         |
|                | 250        | 0.557      |                                     |         |

\*  $R^2$  is the coefficient of determination after the linear fitting.
